# Supplementary material for: Synthesis and characterization of new modified silica coated magnetite nanoparticles with bisaldehyde as selective adsorbents of Ag(i) from aqueous samples
Source: Royal Society of Chemistry journal article supplement (doi:10.1039/c5ra11765h), 2015-01-01

## Supporting Information:

Synthesis and Characterization of new modified silica coated magnetite nanoparticles with bisaldehyde as selective adsorption of Ag (I) from aqueous samples

Alireza Banaei,<sup>\*a</sup> Hossein Vojoudi,<sup>a</sup> Soheyla Karimi,<sup>a</sup> Shahriyar Bahar,<sup>a</sup> Eslam Pourbasheer<sup>a</sup>

<sup>a</sup> Department of Chemistry, Payame Noor University, Tehran, Iran, P.O. Box 19395-4697; Tel: +984533515004; E-mail:

[banaei@pnu.ac.ir](mailto:banaei@pnu.ac.ir)

## CONTENTS

**Figure S1.** FT-IR spectra for *MNPs*

**Figure S2.** FT-IR spectra for *SCMNPs*

**Figure S3.** FT-IR spectra for *APTSCMNPs*

**Figure S4.** FT-IR spectra for BISA- *APTSCMNPs* (Normal method)

**Figure S5.** FT-IR spectra for BISA- *APTSCMNPs* (Vice versa method)

**Figure S6.** Hysteresis loops of the *MNPs* nanoparticles at room temperature using VSM

**Figure S7.** Hysteresis loops of the *SCMNPs* nanoparticles at room temperature using VSM

**Figure S8.** Hysteresis loops of the *APTSCMNPs* nanoparticles at room temperature using VSM

**Figure S9.** Hysteresis loops of the BISA- *APTSCMNPs* (Normal method) nanoparticles at room temperature using VSM

**Figure S10.** Hysteresis loops of the BISA- *APTSCMNPs* (Vice versa method) nanoparticles at room temperature using VSM

**Figure S11.** The Uv-vis spectra of the *MNPs*

**Figure S12.** The Uv-vis spectra of the *SCMNPs*

**Figure S13.** The Uv-vis spectra of the *APTSCMNPs*

**Figure S14.** The Uv-vis spectra of the BISA- *APTSCMNPs* (Normal method)

**Figure S15.** The Uv-vis spectra of the BISA- *APTSCMNPs* (Vice versa method)

## Supporting Information

**Figure S1.** FT-IR spectra for *MNPs*

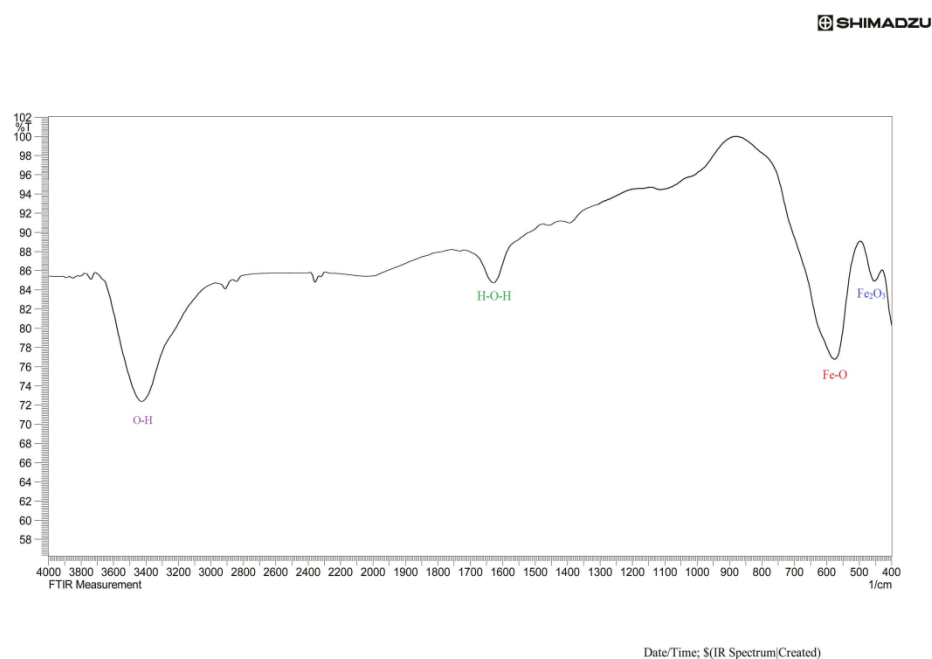

**Figure S2.** FT-IR spectra for *SCMNPs*

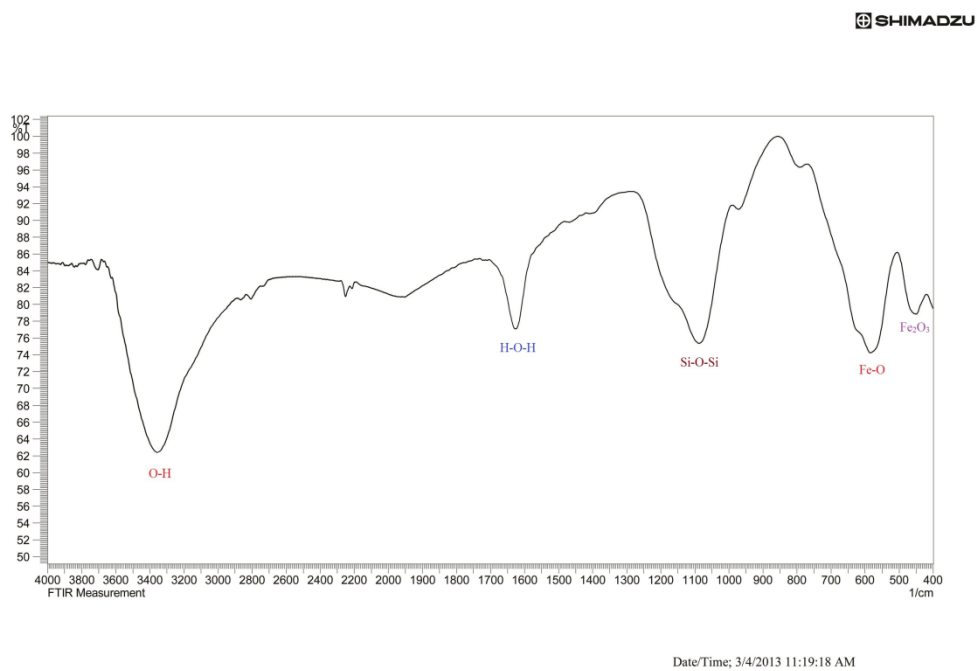

**Figure S3.** FT-IR spectra for *APTSCMNPs*

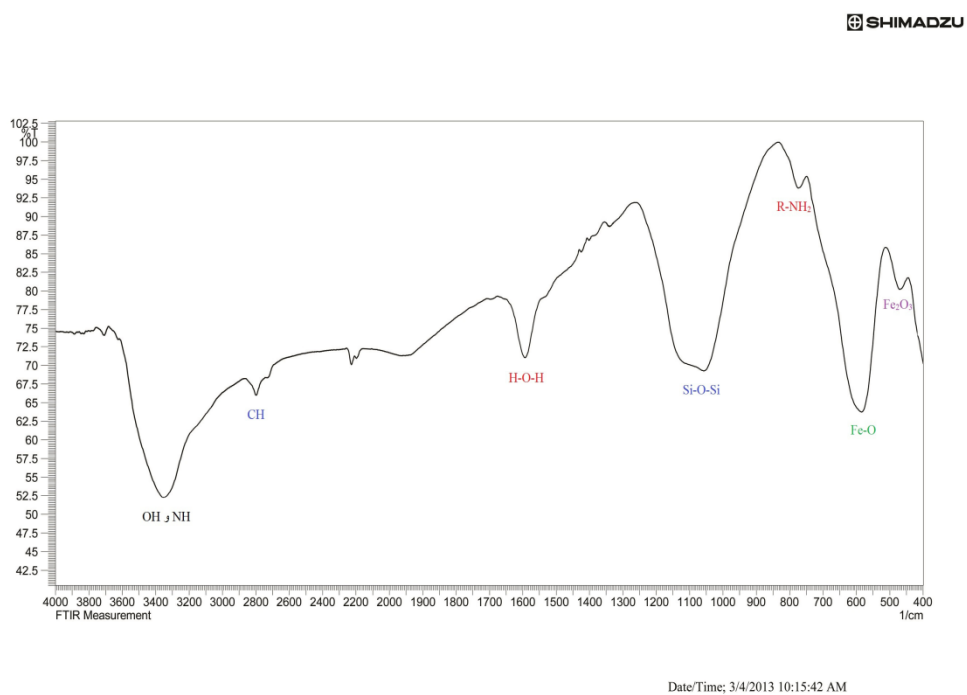

**Figure S4.** FT-IR spectra for BISA- *APTSCMNPs* (Normal method)

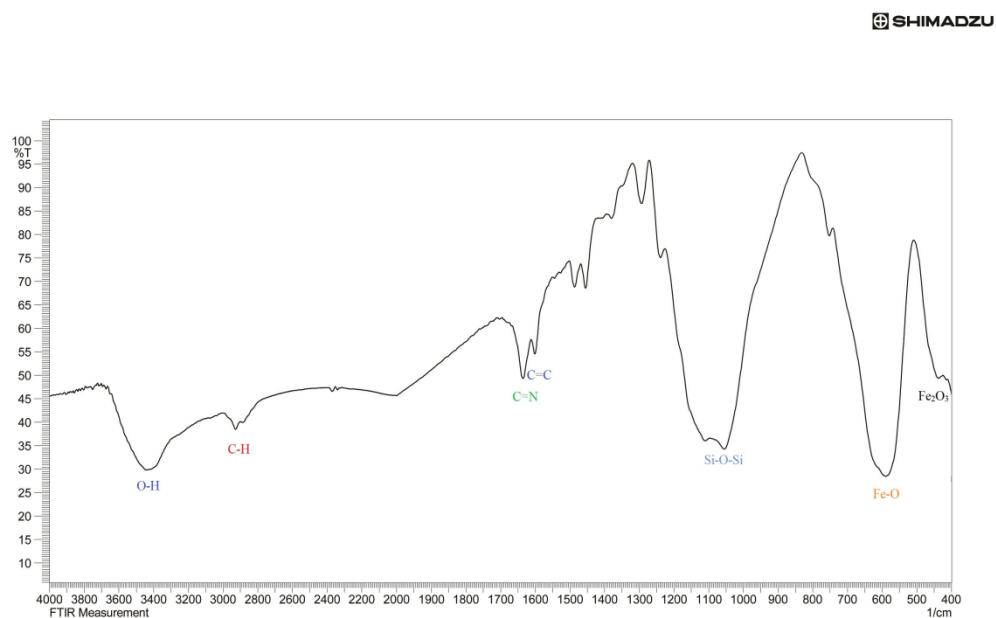

Date/Time; 3/7/2013 1:09:47 PM

**Figure S5.** FT-IR spectra for BISA- *APTSCMNPs* (Vice versa method)

SHIMADZU

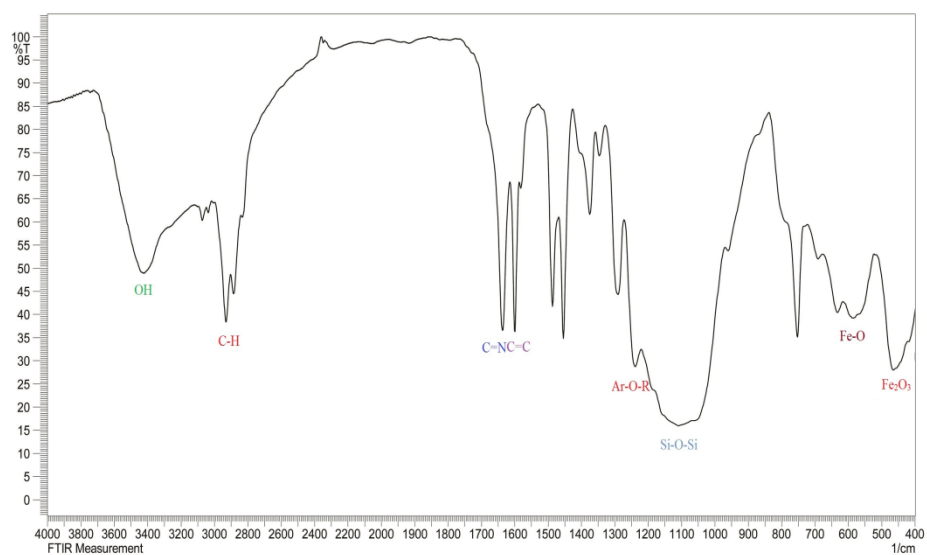

Date/Time; 6/18/2013 1:35:19 PM

**Figure S6.** Hysteresis loops of the *MNPs*

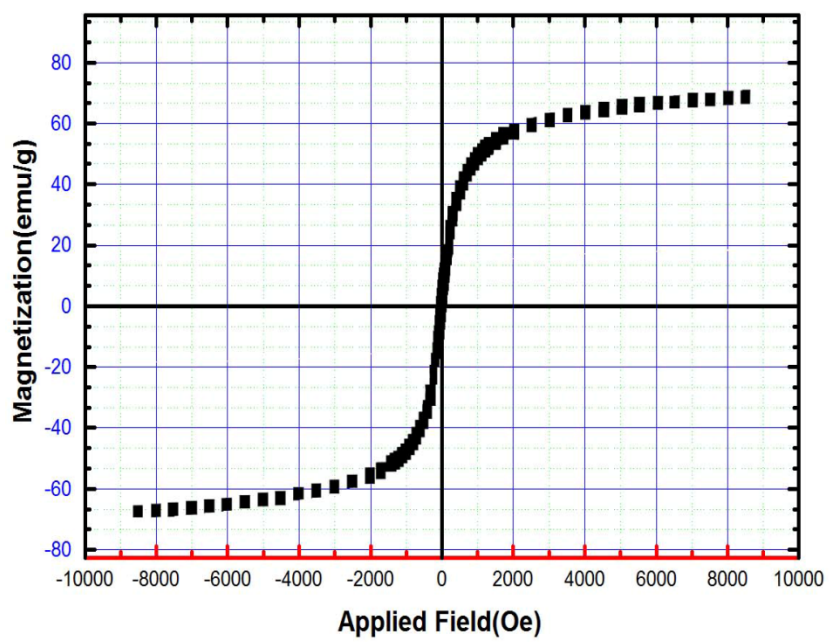

**Figure S7.** Hysteresis loops of the *SCMNPs*

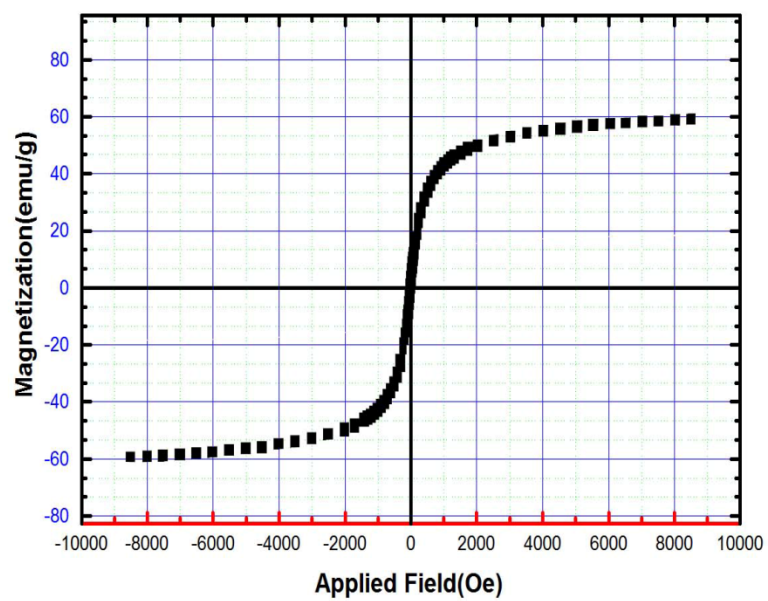



**Figure S8.** Hysteresis loops of the *APTSCMNP*s

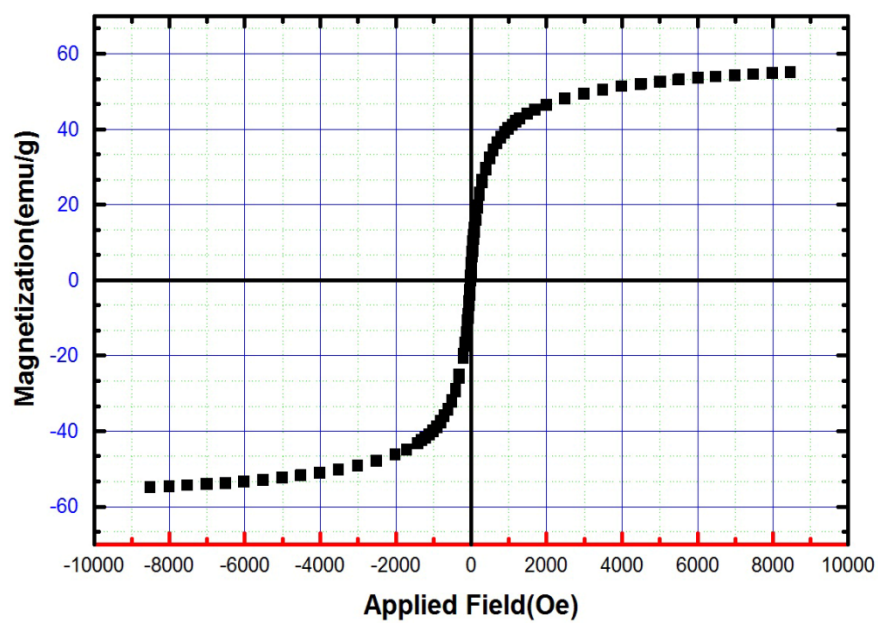

**Figure S9.** Hysteresis loops of the BISA- *APTSCMNP*s (Normal method)

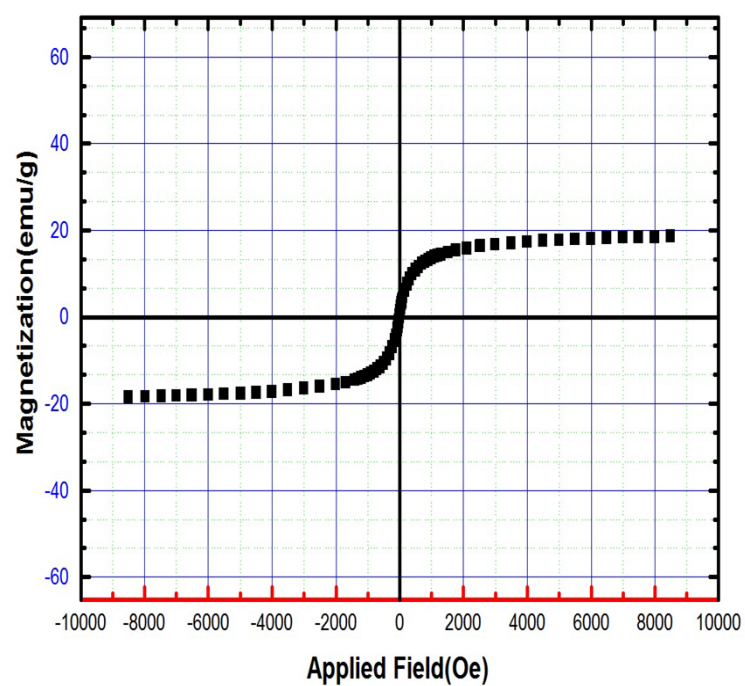

**Figure S10.** Hysteresis loops of the BISA- *APTSCMNP*s (Vice versa method)

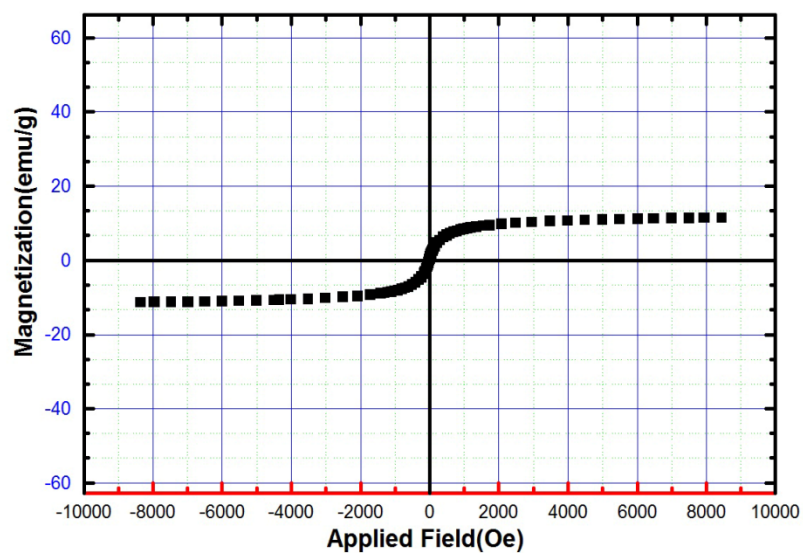

**Figure S11.** The Uv-vis spectra of the *MNPs*

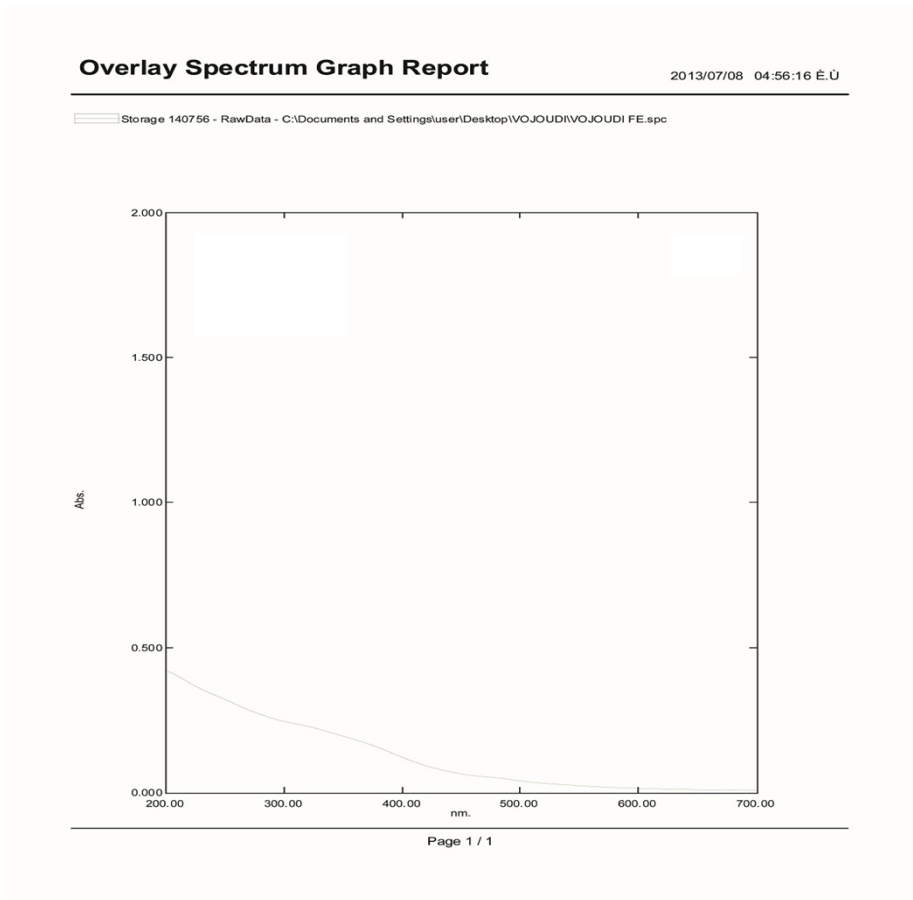

**Figure S12.** The Uv-vis spectra of the *SCMNPs*

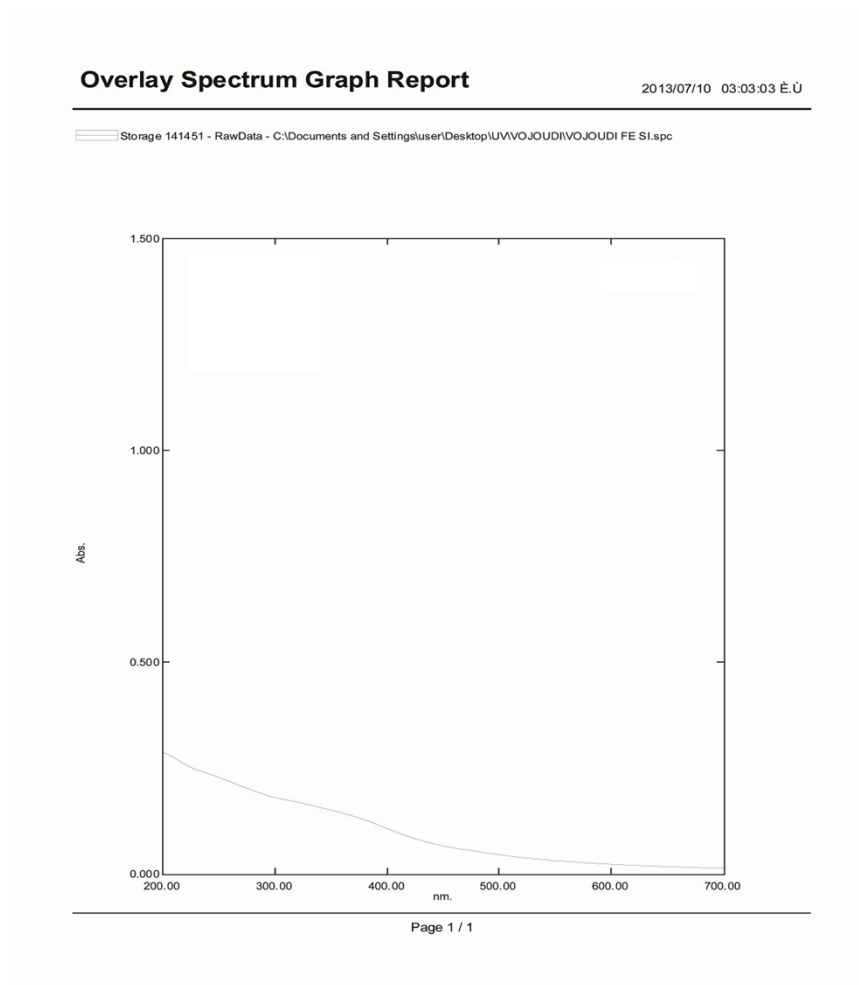

**Figure S13.** The Uv-vis spectra of the *APTSCMNP*s

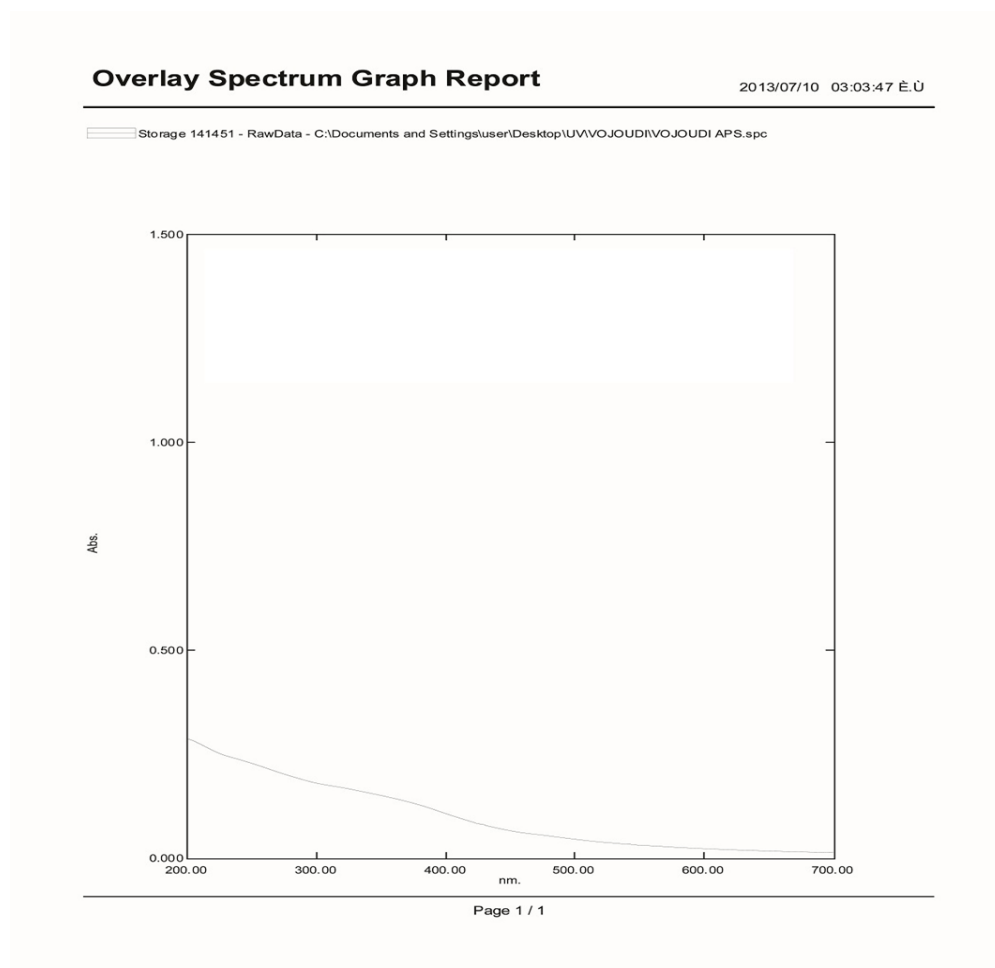

**Figure S14.** The Uv-vis spectra of the BISA- *APTSCMNPs* (Normal method)

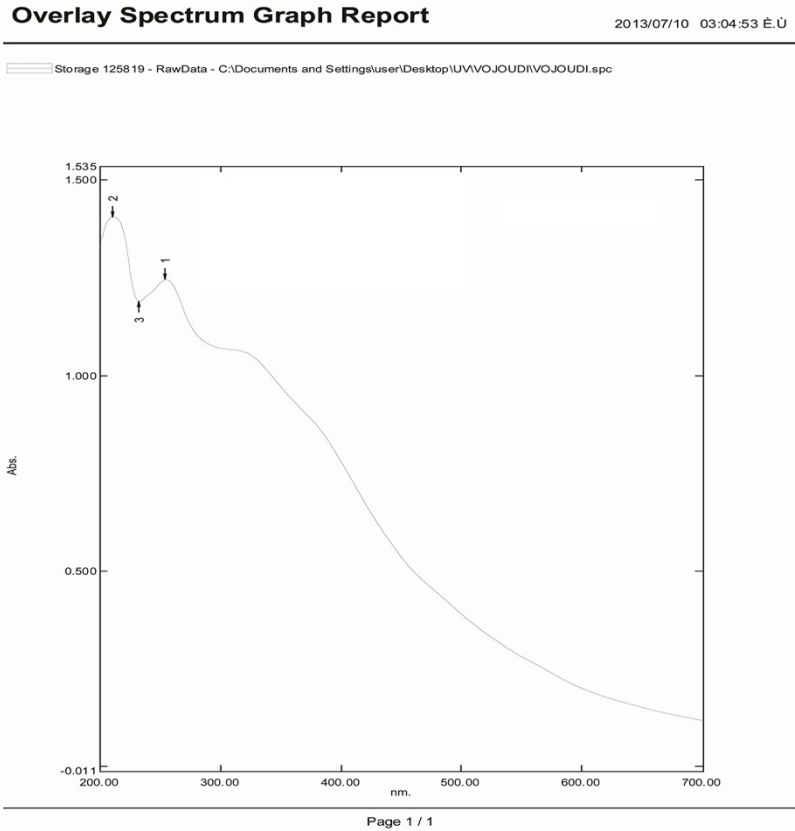

**Figure S15.** The Uv-vis spectra of the BISA- *APTSCMNPs* (Vice versa method)

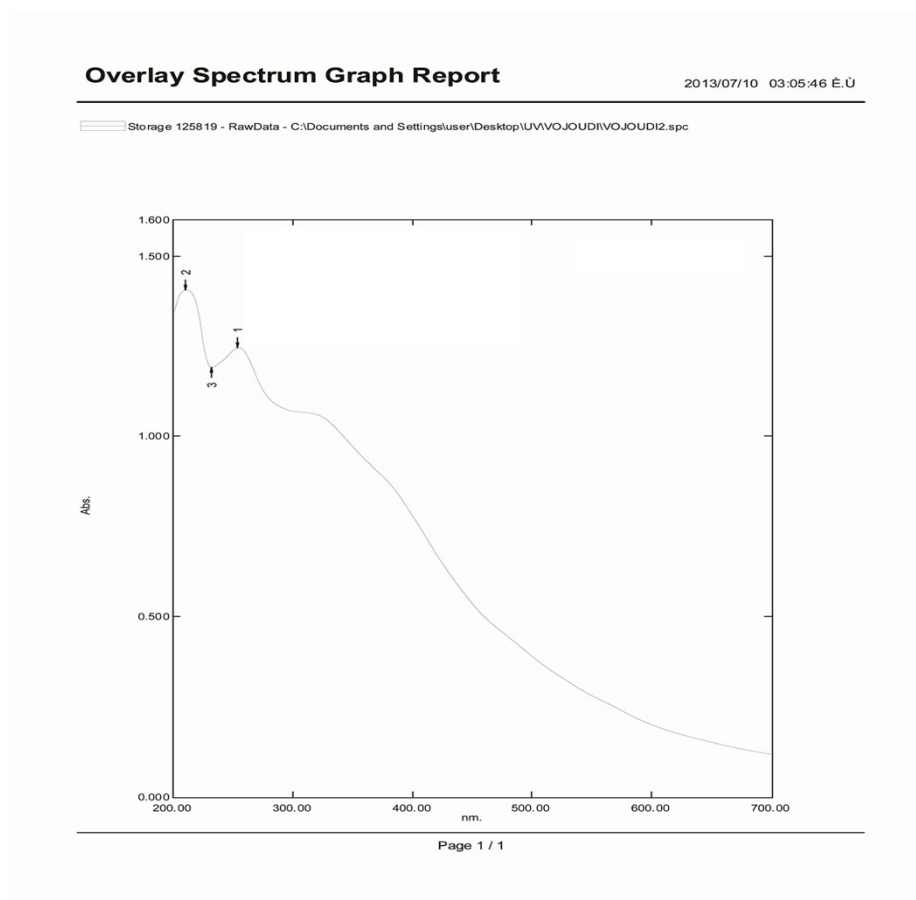

Supplement: c5ra11765h1.pdf [file c5ra11765h1.pdf]
